# Supplementary material for: Identification of a Family of Vibrio Type III Secretion System Effectors That Contain a Conserved Serine/Threonine Kinase Domain
Source: PubMed Central journal article supplement (PMC8386410; doi:10.1128/msphere.00599-21), 2021-08-04
Supplement: msphere.00599-21-sf002.pdf [file msphere.00599-21-sf002.pdf]

FORC14\_RS06170 1 10 20 30 40 50 60 70 80 90  
ATGTCCTTTGTTCCTGACCACTCTCCTATTAGAGGGATGGTAAAATGAATTTATCATCTCTCAGAAC TAGCTAAGCTTTGTTGTATGGAT  
FORC14\_RS05860 ATGTCCTTTAAACCAAAATTGCTCTCCTATTCTGTAGATGTAAAATGAATATCATCTCTCAGAGCTTAGCTAAGTAAGCAACACATGGAT  
consensus>70 ATGTCCTTT...T...T...T...C...TCTCCTATT...G...G...ATG...TAAA...ATGAAT...T...TCATCTCTC...AGA...TAGCT...A...T...T...T...ATGGAT

FORC14\_RS06170 100 110 120 130 140 150 160 170 180  
ATAAAGAAAATCCCAATAAAGATATTAACCGTTAATAAGGACTTAAATTCGCACCAAACTTGTTTAAGAGACGCCAACTTAAAGCA  
FORC14\_RS05860 ATAAAGGATAACCAATAAAGATATTAACCGTTAATAAAGGACTTAAATTCGCACCAAACTTGTTTAAGAGACGCCAACTTAAAGCA  
consensus>70 AT...AA...A...AT...TCCAATAAAGATATT...AACGGT...TA...ATA...AC...TT...A...TCGAC...A...AAACTT...TTTAAAGAGA...CG...AAGT...A...CGA

FORC14\_RS06170 190 200 210 220 230 240 250 260 270  
CTTCTGGTAAACTTGTCCCAATGCTGACACCGACGATCCATAAAACGGTTTATGACTTAATTGTAAAGCAATGAGGAGTTGTTACAGCGT  
FORC14\_RS05860 CTTCTAACTAAAATTGCTTATGCTGACACCGACGATCCATAAAACGGTTTATGACTTAATTGTAAAGCAATGAGGAGTTGTTACAGCGT  
consensus>70 CTT...T...TAAA...TTG...A...TGTC...ACC...GA...CA...CC...AAAA...GTTT...GAG...TAATT...TAAAGC...AA...CAGG...TT...T...CAGCGT

FORC14\_RS06170 280 290 300 310 320 330 340 350 360  
TTTGAAGGACTTAAACAGAGAGCTATTTATTGATAAAGATATTGGTGTGGATATAAACTATTTAAATTAATACATACATGGCTAAGTTT  
FORC14\_RS05860 TTTGAAGGCACTTAAACAGAGAGCTATTTATTGATAAAGATATTGGTGTGGATATAAACTATTTAAATTAATACATACATGGCTAAGTTT  
consensus>70 TT...GAAGG...AC...AA...GAGA...GT...TTTATTGATAA...GA...ATTGG...TTGG...TATAAACTATTTAAA...T...ATAG...ACATGG...C...A...T...

FORC14\_RS06170 370 380 390 400 410 420 430 440 450  
CCAGATCCGATGAGCTTCTAAATGATATTTATAAGAAATAATTTTATAATGCTAATATGCTAAATATGCTCATTTGCTTTGCTTTATA  
FORC14\_RS05860 CCAGATCCGATGAGAAATCTGAAATGATATTTATAAAGAAATGTTTATAATGCTAATATGCTCAATATGCTCATTTGCTTTGCTTTATA  
consensus>70 CC...A...CCGATGA...G...T...AA...GATATTTATA...AA...AAA...TTTTATAATG...A...TATGCT...A...TATGCTCA...TTTG...TT...TATA

FORC14\_RS06170 460 470 480 490 500 510 520 530 540  
GAGATGTTGACGATCGTCAAGTTCACAAACCTAAAATATTAGTGGCCGTTTTTAAGTATGACGAGGGGCTGACCGTTTGGCCCATAC  
FORC14\_RS05860 GAAATGTTGACGATCGTCAACTTACATAAACTAAAATATTAGTGGCAATATTAAGCAATATGCTCAATATGCTCATTTGCTTTGCTTTATA  
consensus>70 GA...ATG...T...GA...GATCGTCA...T...A...AA...CCTAAA...TATTAGT...GG...T...TTTA...A...AT...GG...GCTGA...CGTTT...G...CC...A...

FORC14\_RS06170 550 560 570 580 590 600 610 620 630  
GAAAAAATCCCATTCCTAGTTTTTAAATAAGAAATTTAGGTTATATGCCCCTTGAATCAAGCCCTGATAATTTTGTCAAAGTAAAA  
FORC14\_RS05860 GAAAAAATCCCATTCCTAGTTTTTAAATAAGAAATTTAGGTTATATGCCCCTTGAATCAAGCCCTGATAATTTTGTCAAAGTAAAA  
consensus>70 GAAAAAAT...CCAT...TC...TTTTA...TAAA...TT...GAA...T...TTAGGTTATATGCCC...TTTGA...T...AAGCCTGA...AATTTTGTCAA...GTAAAA

FORC14\_RS06170 640 650 660 670 680 690 700 710 720  
AATTCGCTGGAAATTATGATACCTTCCTATTGACTCTAAGCAAATAGGTTTGCACAAAGTGAATCTAAGAGAACATTTCAATGTAGAT  
FORC14\_RS05860 AACCTCTGGGTTATTATGATACCTTCCTATTGACTCTAAGCAAATAGGTTTGCATCTGAAGTGAATCTAAGAACATTTCAATGTAGATA  
consensus>70 AA...CT...GG...ATTATGA...TACCTTCCTATTGA...TCTAA...CAAAT...GGTTTGA...A...AAGTGA...TC...A...AGAACATTTCA...GTA...

FORC14\_RS06170 730 740 750 760 770 780  
AAATTAGACGAAAATTCGGGGCTTATGATTATAAAGAATGTTTGTGATATTCGGGTTAG  
FORC14\_RS05860 AAATTAGAAAATAATTCGGGAACTTATATTATAAAGAATGTTTGTGATATTCGGGTTAG  
consensus>70 AA...TTTGA...AAA...T...CGG...CTTAT...ATTATAA...AAGA...TTTGT...GA...TAT...GTTAG
