# Supplementary material for: Identification of a Family of Vibrio Type III Secretion System Effectors That Contain a Conserved Serine/Threonine Kinase Domain
Source: PubMed Central journal article supplement (PMC8386410; doi:10.1128/msphere.00599-21), 2021-08-04
Supplement: msphere.00599-21-sf003.pdf [file msphere.00599-21-sf003.pdf]

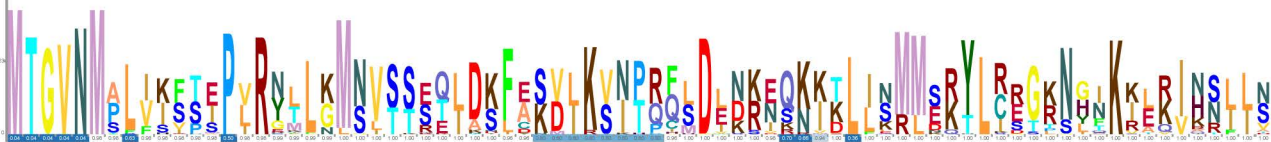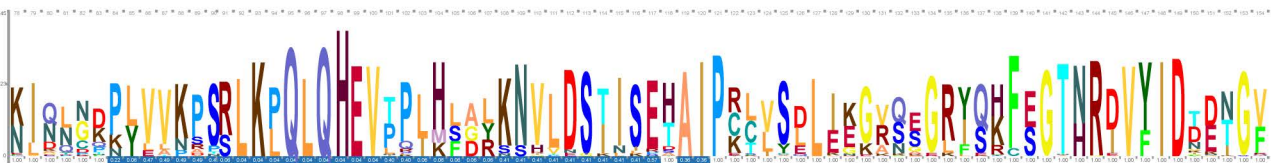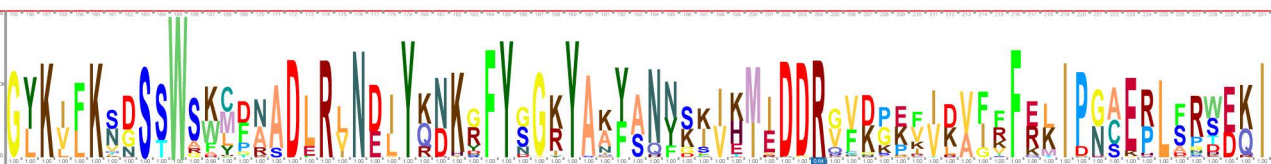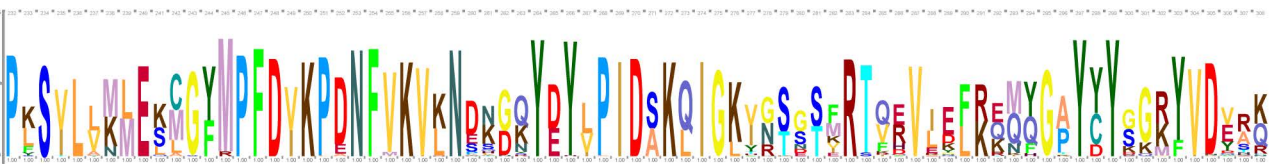

C-terminal region
